# Supplementary material for: Unravelling the onset of the exchange bias effect in Ni(core)@NiO(shell) nanoparticles embedded in a mesoporous carbon matrix
Source: Royal Society of Chemistry journal article supplement (doi:10.1039/c5tc01095k), 2015-01-01
Supplement: c5tc01095k2.pdf [file c5tc01095k2.pdf]

SUPPLEMENTARY INFORMATION

**Unravelling the onset of the exchange bias effect in Ni(core)@NiO(shell) nanoparticles embedded in a mesoporous carbon matrix**

Natalia Rinaldi-Montes,<sup>\*,a</sup> Pedro Gorria,<sup>b</sup> David Martínez-Blanco,<sup>c</sup> Zakariae Amghouz,<sup>c</sup> Antonio B. Fuertes,<sup>d</sup> Luis Fernández Barquín,<sup>e</sup> Imanol de Pedro,<sup>e</sup> Luca Olivi,<sup>f</sup> and Jesús A. Blanco<sup>a</sup>

<sup>a</sup> Departamento de Física, Universidad de Oviedo, E-33007 Oviedo, Spain.

<sup>b</sup> Departamento de Física & IUTA, EPI, Universidad de Oviedo, E-33203 Gijón, Spain.

<sup>c</sup> Servicios Científico-Técnicos, Universidad de Oviedo, E-33006 Oviedo, Spain.

<sup>d</sup> Instituto Nacional del Carbón (CSIC), E-33080 Oviedo, Spain.

<sup>e</sup> CITIMAC, Facultad de Ciencias, Universidad de Cantabria, E-39005 Santander, Spain.

<sup>f</sup> Elettra-Sincrotrone Trieste S.C.p.A., 34149 Basovizza, Trieste, Italy.

Corresponding author E-mail: nataliarin@gmail.com

## 1. Size distribution of the nanoparticles

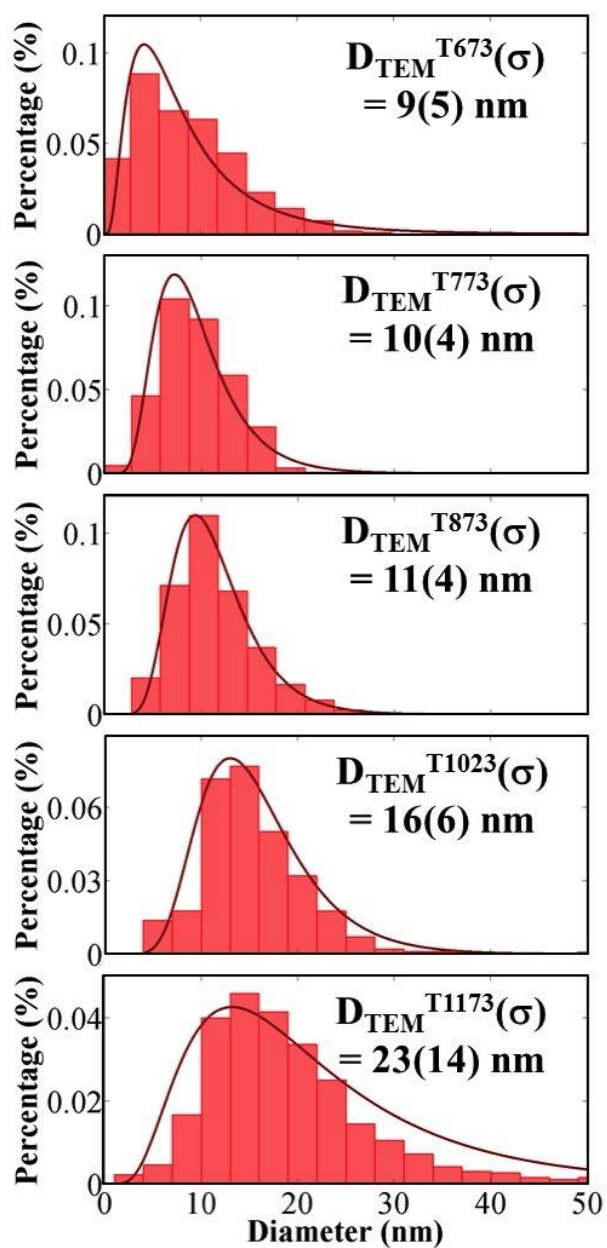

**Figure S1.** (Color online) Histograms of the particle size distributions of the samples together with log-normal fits, providing mean NP diameters ( $D_{\text{TEM}}$ ) and standard deviations ( $\sigma$ ).

## 2. $M(H)$ curves measured at $T = 300$ K

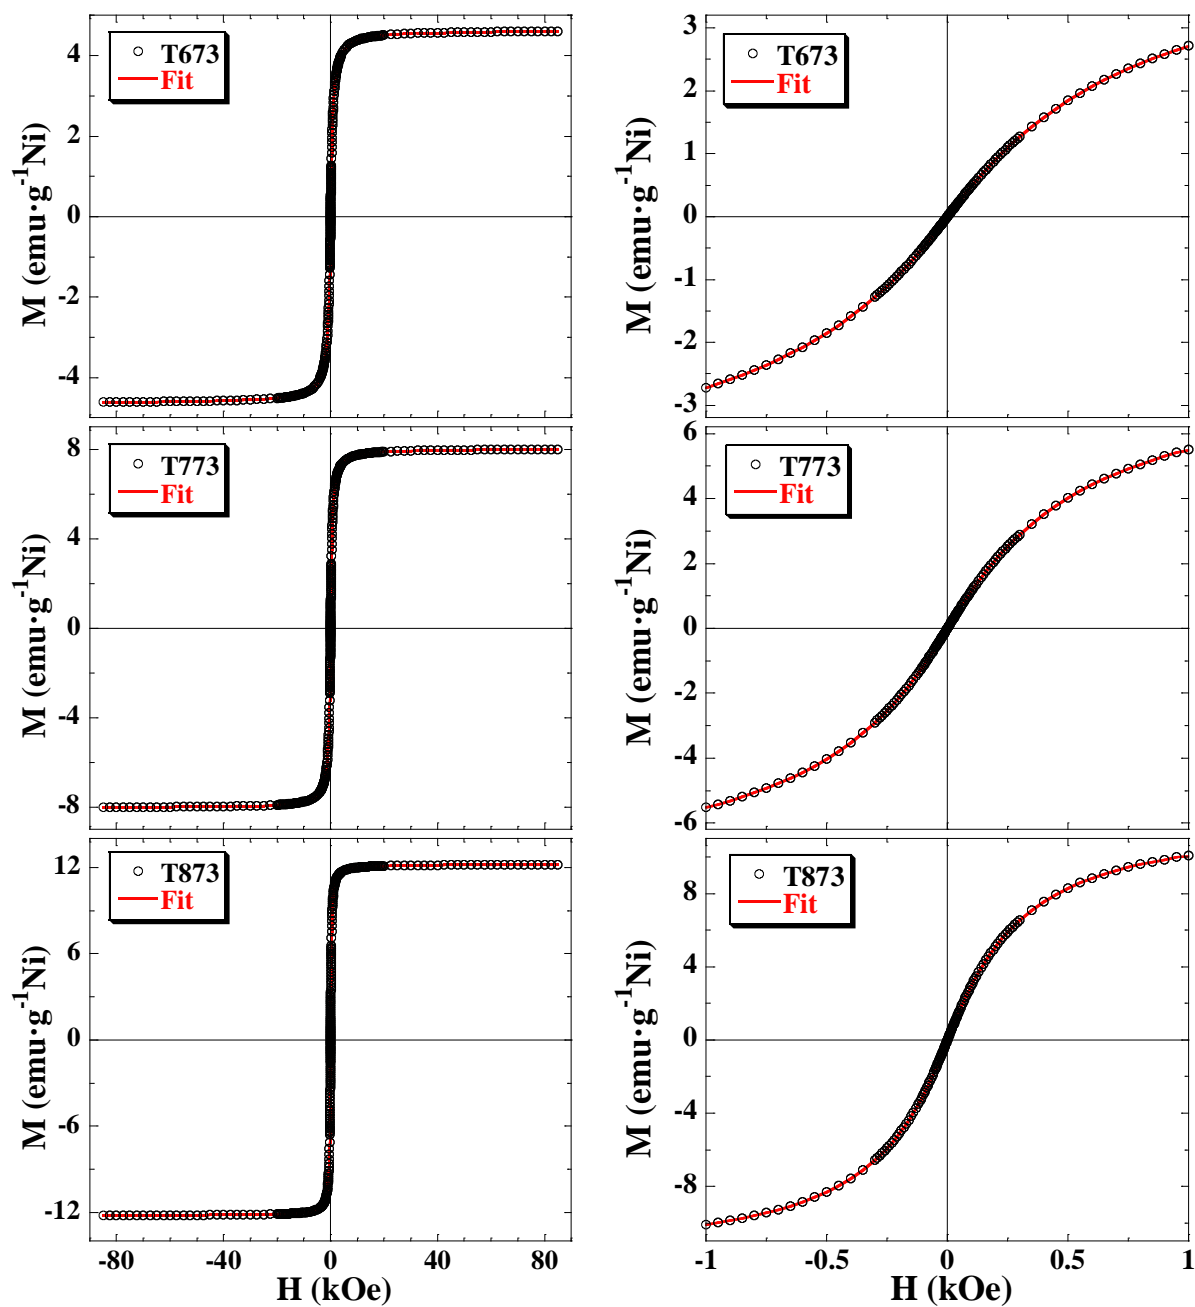

**Figure S2.** (Color online) (Left)  $M(H)$  curves for samples T673, T773 and T873 (empty circles) measured at room temperature ( $T = 300$  K). Lines represent the best fit of the experimental data to a combination of the Langevin function and the lognormal size distribution.<sup>60</sup> (Right) Enlarged views of the central part of the left  $M(H)$  curves.

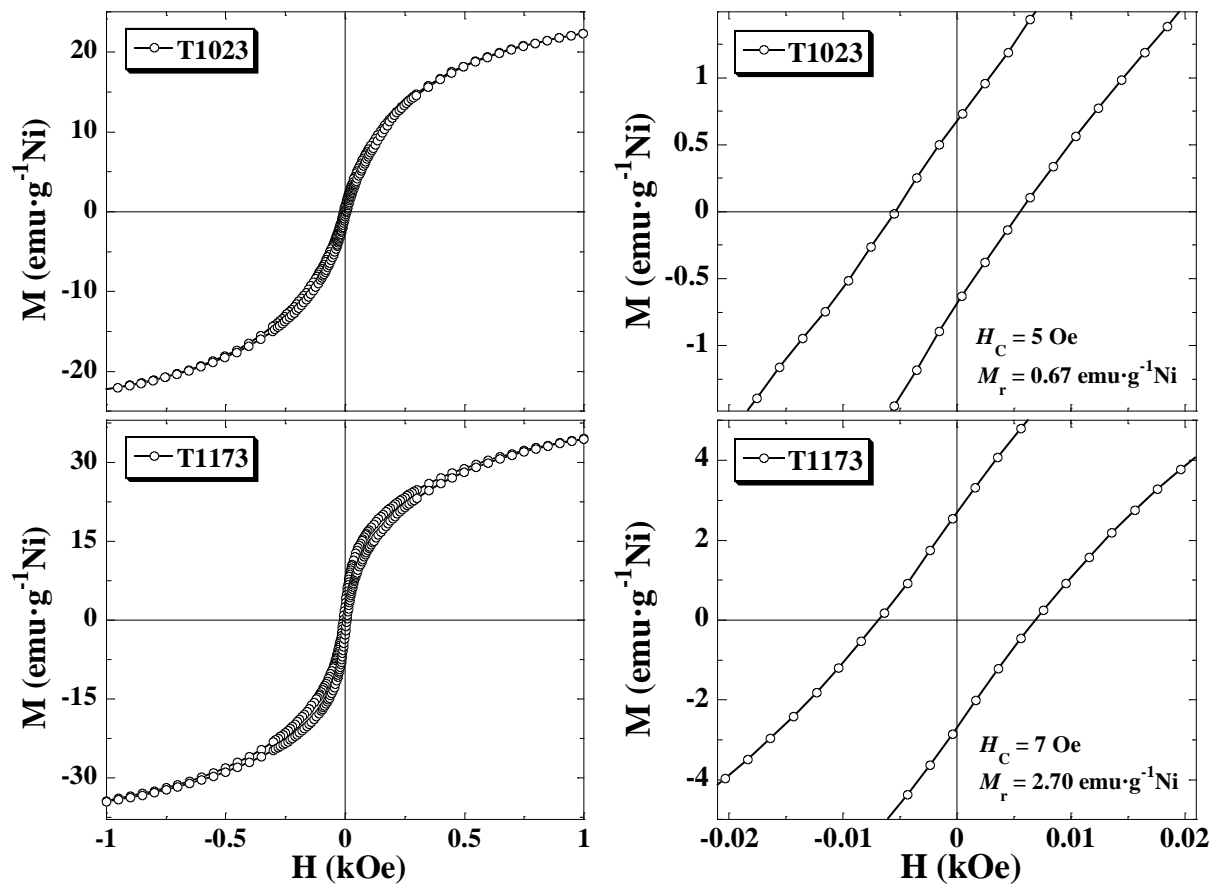

**Figure S3.** (Color online) (Left)  $M(H)$  curves for samples T1023 and T1173 (empty circles) measured at room temperature ( $T = 300$  K), showing a small hysteresis loop. Lines provide guides for the eyes. (Right) Enlarged views of the central part of the left  $M(H)$  curves.
